# Supplementary material for: Altered functional brain networks in problematic Internet use: resting-state fMRI study
Source: Research Square preprint supplement (doi:10.21203/rs.3.rs-2718429/v1), 2023-03-29
Supplement: Supplementary file 1 [file 0ec7d8c9605d85657768a19f.docx]

Table 1. Descriptives of the self-reported questionnaires

| **Questionnaires** | **Median** | **Minimum** | **Maximum** |
| --- | --- | --- | --- |
| SABAS | 19 | 10 | 32 |
| PIU-Q total | 30 | 18 | 51 |
| PIU-Q obsession | 8 | 6 | 17 |
| PIU-Q neglect | 11 | 6 | 20 |
| PIU-Q control | 10 | 6 | 22 |
| BSMAS | 9 | 6 | 22 |

SABAS: Smartphone Application-Based Addiction Scale; PIU-Q: Problematic Internet Use Questionnaire; BSMAS: Bergen Social Media Addiction Scale
