# Supplementary material for: Altered functional brain networks in problematic Internet use: resting-state fMRI study
Source: Research Square preprint supplement (doi:10.21203/rs.3.rs-2718429/v1), 2023-03-29
Supplement: Supplementary file 2 [file b6454ea07c62057350704425.docx]

Table 2. Independent components showing negative associations with questionnaire scores. FWE corrected (for multiple comparisons across voxels) P-values are reported.

| **Component** | **Cluster** | **Area** | **Voxels** | **Min p-value** | **MNI coordinates** | | |
| --- | --- | --- | --- | --- | --- | --- | --- |
| **X** | **Y** | **Z** |
| **BSMAS** | | | | | | | |
| IC 2 | C1 | **Lateral visual network**  Right lateral occipital cortex | 33 | 0.022 | 32 | -72 | 36 |
| IC 7 | C1  C2  C3  C4  C5 | **Executive control network**  Left middle frontal gyrus  Left superior frontal gyrus  Left precentral gyrus  Right superior frontal gyrus  Right insular cortex  Right frontal operculum cortex  Right frontal orbital cortex  Right insular cortex  Right frontal orbital cortex | 462  119  91  49  26 | 0.002  0.005  0.035  0.03  0.029 | -26  16  18  42  36 | 4  16  18  26  18 | 60  64  -2  -10  -10 |
| IC 11 | C1 | **Language network**  Anterior cingulate gyrus  Right paracingulate gyrus | 28 | 0.027 | 4 | 32 | 24 |
| IC 13 | C1 | **Sensorimotor network**  Posterior cingulate cortex | 21 | 0.028 | -20 | -38 | 28 |
| **PIU-Q CONTROL** | | | | | | | |
| IC 11 | C1 | **Language network**  Anterior cingulate gyrus  Right paracingulate gyrus | 183 | 0.014 | 0 | 26 | 28 |
| IC 14 | C1 | **Auditory network**  Left lateral occipital cortex | 48 | 0.008 | -30 | -78 | 20 |
| **PIU-Q NEGLECT** | | | | | | | |
| IC 5 | C1  C2  C3 | **Medial visual network**  Right precentral gyrus  Right postcentral gyrus  Right precentral gyrus  Right postcentral gyrus  Right middle temporal gyrus  Right lateral occipital cortex | 87  57  42 | 0.008  0.022  0.031 | 34  40  46 | -18  -10  -54 | 44  38  10 |
| **PIU-Q OBSESSION** | | | | | | | |
| IC 11 | C1 | **Language network**  Subcallosal cortex | 12 | 0.014 | 4 | 10 | -8 |
| **SABAS** | | | | | | | |
| IC 11 | C1 | **Language network**  Left precentral gyrus  Left postcentral gyrus | 28 | 0.017 | -24 | -28 | 62 |
